# Supplementary material for: Coordinated regulation of the mitochondrial retrograde response by circadian clock regulators and ANAC017
Source: PubMed Central journal article supplement — Plant Commun. 2022 Dec 5;4(1):100501. doi: 10.1016/j.xplc.2022.100501 (PMC9860193; doi:10.1016/j.xplc.2022.100501), 2022-12-05
Supplement: mmc1.pdf [file mmc1.pdf]

**Plant Communications, Volume 4**

**Supplemental information**

**Coordinated regulation of the mitochondrial retrograde response by circadian clock regulators and ANAC017**

**Yanqiao Zhu, Reena Narsai, Cunman He, Yan Wang, Oliver Berkowitz, James Whelan, and Lim Chee Liew**

## **Supplemental Information for**

Coordinated regulation of the mitochondrial retrograde response by  
circadian clock regulators and ANAC017

Yanqiao Zhu, Reena Narsai, Cunman He, Yan Wang, Oliver Berkowitz, James  
Whelan, Lim Chee Liew

Department of Animal, Plant and Soil Science, ARC Centre of Excellence in Plant  
Energy Biology, La Trobe University, Bundoora, Victoria 3086, Australia

### **Corresponding author:**

Lim Chee Liew

Department of Animal, Plant and Soil Science

School of Life Science

La Trobe University

Bundoora, Victoria 3086, Australia

E-mail: [L.Liew@latrobe.edu.au](mailto:L.Liew@latrobe.edu.au)

Tel.: +61 3 9032 7412

**running title: Mitochondrial retrograde signalling**

A

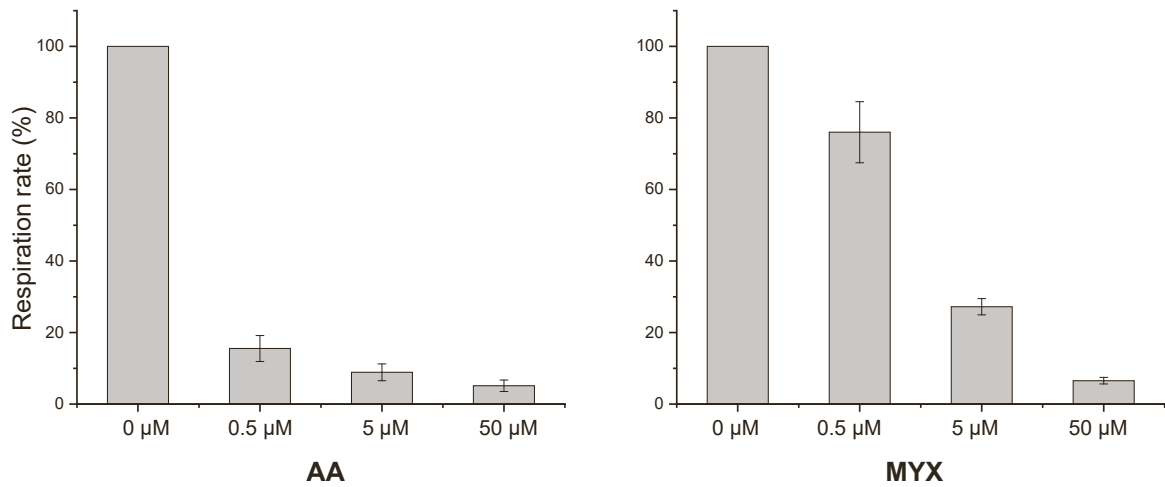

B

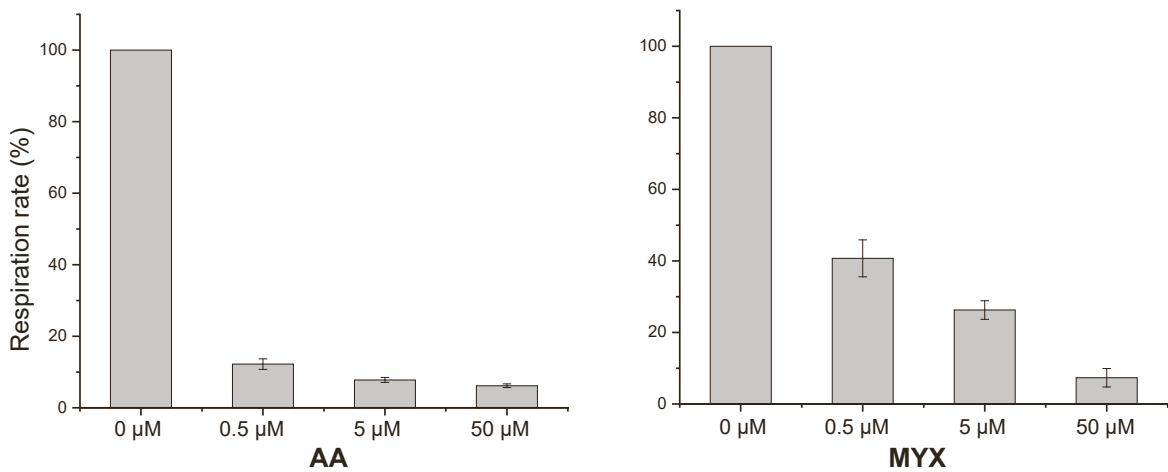

**Figure S1. Oxygen consumption of mitochondria or leaf discs from wild type plants after addition of antimycin A (AA) or myxothiazol (MYX).**

**(A)** Purified mitochondria isolated from 12-day old plants (Col-0) after treatment with antimycin A (AA) or myxothiazol (MYX) at concentrations of 0, 0.5, 5, and 50  $\mu\text{M}$ .

**(B)** Leaf discs from four weeks old plants (Col-0) after treatment with antimycin A (AA) and myxothiazol (MYX) at concentrations of 0, 0.5, 5, and 50  $\mu\text{M}$ .

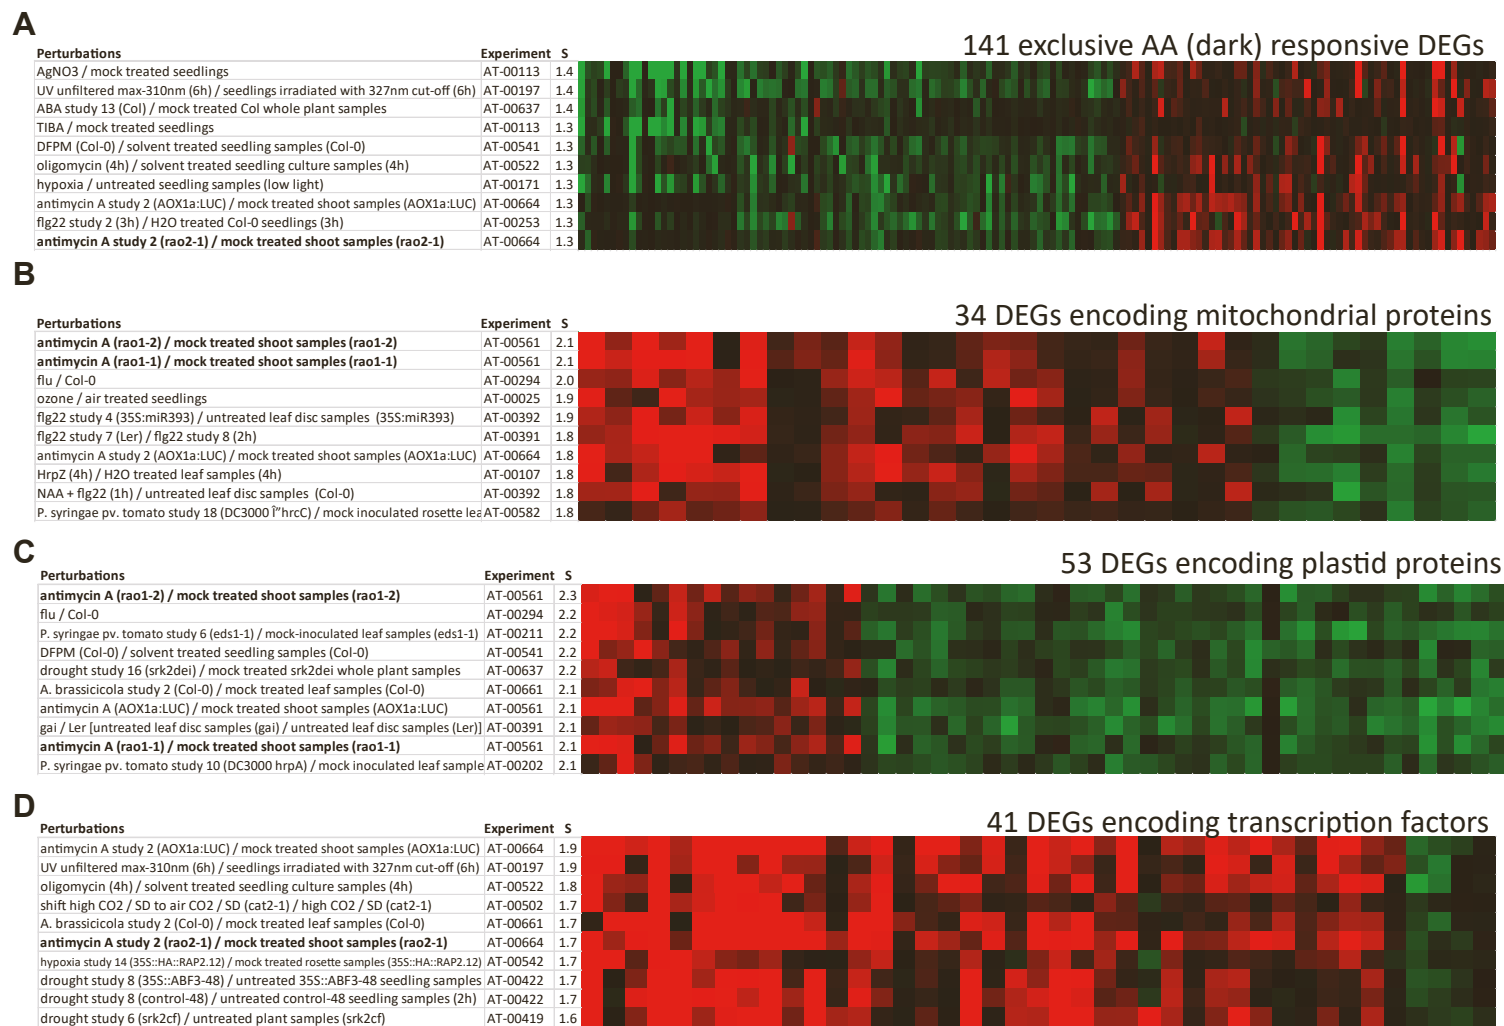

**Figure S2. Characterisation of the antimycin A (AA) specific response in dark conditions.**

(A) Genes exclusively differentially expressed in response to antimycin A in the dark were analysed using the signature tool within Genevestigator to identify studies (perturbations) that showed the most similar fold-change responses. Similarity score (S) is indicated. The top 10 studies in which similar fold-change responses were observed for these genes are shown.

(B) Fold-changes for antimycin A responsive genes in the dark encoding 34 mitochondrial proteins. Similarity score (S) and the top 10 studies showing greatest similarity to these are indicated.

(C) Fold-changes for antimycin A responsive genes in the dark encoding 53 chloroplast proteins. Similarity score (S) and the top 10 studies showing greatest similarity to these are indicated.

(D) Fold-changes for antimycin A responsive genes in the dark encoding 41 transcription factors. Similarity score (S) and the top 10 studies showing greatest similarity to these are indicated.

Each subset contained antimycin A treated rao mutant studies (indicated in bold).

**A**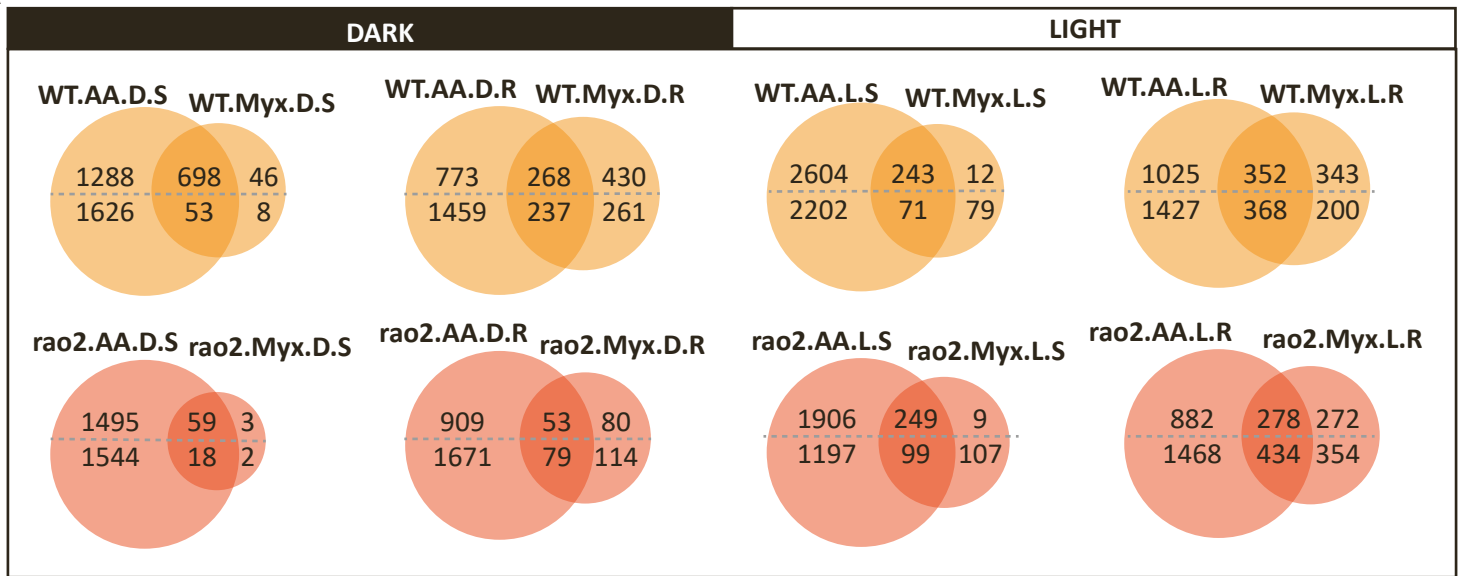**B**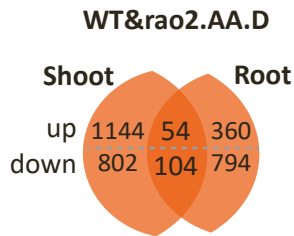

**Figure S3. Venn diagrams showing the response to antimycin A (AA) and myxothiazol (MYX) treatments in light and dark.**

**(A)** Overlapping number of differentially expressed genes between Col-0 wild type (WT) and ANAC017 mutant line (*rao2*) following antimycin A (AA) and myxothiazol (Myx) treatment in the light (L) and dark (D) in shoot (S) and roots (R).

**(B)** Overlapping number of differentially expressed genes between shoot and root that were also overlapping between Col-0 wild type (WT) and an ANAC017 mutant line (*rao2*) in response to AA treatment in the dark.

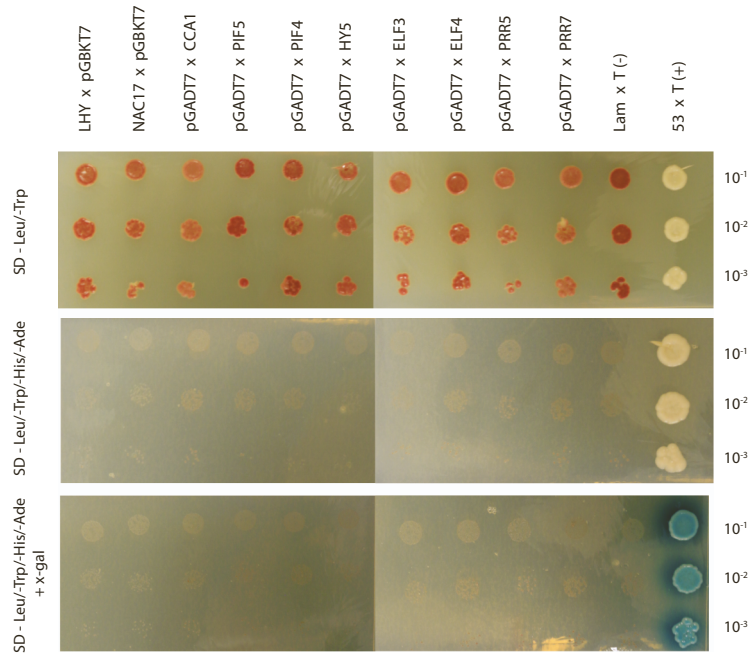

**Figure S4. Self-activation test for protein-protein interactions shown in Figure 6.** ANAC017 and circadian genes were cloned into pGBKT7 and pGADT7, followed by transformation into Y2HGold strain or Y187 strain separately. Mating was performed between each clone with empty vectors to test for self-activation. Successful mating was confirmed by growth on SD/-leu/-trp media. Self-activation was determined by growth on SD/-Leu/-Trp/-His/-Ade (with or without x-gal) with serial dilutions shown. pGBKT7-53 and pGBKT7-Lam transformed in Y2HGold strain were mated with pGADT7-T in Y187 strain as positive and negative controls.

**Table S1: Binding sites of transcription factors regulating clock- and light-dependent processes in the AOX1a and ANAC013 promoter regions (Figure 4A,B) (data retrieved from the ReMap 2022, <https://remap.univ-amu.fr/>)**

| target gene | chr | start    | end      | TF    | score | strand | peak start | peak end |
|-------------|-----|----------|----------|-------|-------|--------|------------|----------|
| AOX1a       | 3   | 7905282  | 7905587  | ELF3  |       | 5 .    | 7905453    | 7905454  |
| AOX1a       | 3   | 7906287  | 7906822  | LHY   |       | 2 .    | 7906531    | 7906532  |
| AOX1a       | 3   | 7906321  | 7906736  | CCA1  |       | 2 .    | 7906536    | 7906537  |
| AOX1a       | 3   | 7906340  | 7906807  | GI    |       | 1 .    | 7906574    | 7906575  |
| AOX1a       | 3   | 7906344  | 7906859  | PIF5  |       | 1 .    | 7906637    | 7906638  |
| AOX1a       | 3   | 7906344  | 7906956  | PIF4  |       | 1 .    | 7906574    | 7906575  |
| AOX1a       | 3   | 7906425  | 7906949  | HY5   |       | 6 .    | 7906670    | 7906671  |
| AOX1a       | 3   | 7906452  | 7906743  | ELF3  |       | 6 .    | 7906591    | 7906592  |
| AOX1a       | 3   | 7906456  | 7906825  | APRR7 |       | 1 .    | 7906638    | 7906639  |
| AOX1a       | 3   | 7906494  | 7906783  | APRR5 |       | 1 .    | 7906616    | 7906617  |
| ANAC013     | 1   | 11908415 | 11908698 | HY5   |       | 1 .    | 11908596   | 11908597 |
| ANAC013     | 1   | 11908612 | 11909067 | ELF3  |       | 6 .    | 11908862   | 11908863 |
| ANAC013     | 1   | 11909102 | 11909526 | PIF3  |       | 1 .    | 11909354   | 11909355 |
| ANAC013     | 1   | 11909152 | 11909860 | LHY   |       | 2 .    | 11909610   | 11909611 |
| ANAC013     | 1   | 11909342 | 11909674 | GI    |       | 1 .    | 11909369   | 11909370 |
| ANAC013     | 1   | 11909394 | 11909621 | HY5   |       | 1 .    | 11909497   | 11909498 |
| ANAC013     | 1   | 11909417 | 11909720 | CCA1  |       | 3 .    | 11909581   | 11909582 |
| ANAC013     | 1   | 11909422 | 11909764 | RVE4  |       | 1 .    | 11909590   | 11909591 |
| ANAC013     | 1   | 11909433 | 11909769 | RVE6  |       | 1 .    | 11909607   | 11909608 |
| ANAC013     | 1   | 11909503 | 11909716 | RVE5  |       | 1 .    | 11909611   | 11909612 |
| ANAC013     | 1   | 11909520 | 11909682 | RVE7  |       | 1 .    | 11909605   | 11909606 |
| ANAC013     | 1   | 11910472 | 11910882 | ELF3  |       | 1 .    | 11910667   | 11910668 |
| ANAC013     | 1   | 11911130 | 11911716 | LHY   |       | 1 .    | 11911533   | 11911534 |
| ANAC013     | 1   | 11911375 | 11911756 | HY5   |       | 3 .    | 11911578   | 11911579 |

**Table S2. Top50 enriched TFs sharing binding sites with ANAC017 (Figure**

| TF           | mapped.         |                    |                 |                 |                    |             |                    |         | e.significanc |
|--------------|-----------------|--------------------|-----------------|-----------------|--------------------|-------------|--------------------|---------|---------------|
|              | nb.ove<br>rlaps | random.<br>average | peaks.rat<br>io | effect.si<br>ze | p.significa<br>nce | p.val<br>ue | q.significa<br>nce | q.value |               |
| SPT6         | 1600            | 17.67              | 0.0508          | 6.501           | 2447.900           | 0           | 2446.516           | 0       | 2445.29       |
| AGO1         | 1349            | 18.83              | 0.0497          | 6.162           | 1928.639           | 0           | 1927.259           | 0       | 1926.02       |
| ARR1         | 1298            | 18.33              | 0.0384          | 6.146           | 1849.391           | 0           | 1848.015           | 0       | 1846.78       |
| AT2G14045    | 1028            | 8.67               | 0.0685          | 6.890           | 1693.502           | 0           | 1692.13            | 0       | 1690.89       |
| ARR12        | 908             | 5.83               | 0.0876          | 7.282           | 1602.752           | 0           | 1601.383           | 0       | 1600.14       |
| WRKY33       | 930             | 8.67               | 0.0578          | 6.746           | 1492.267           | 0           | 1490.902           | 0       | 1489.65       |
| WIP2         | 995             | 12.67              | 0.0480          | 6.296           | 1462.851           | 0           | 1461.49            | 0       | 1460.24       |
| WRKY42       | 903             | 8.83               | 0.0677          | 6.676           | 1430.187           | 0           | 1428.829           | 0       | 1427.57       |
| SYD          | 1063            | 18.33              | 0.0375          | 5.858           | 1424.355           | 0           | 1423.001           | 0       | 1421.74       |
| NAC078       | 693             | 2.33               | 0.0771          | 8.214           | 1417.959           | 0           | 1416.609           | 0       | 1415.35       |
| WRKY18-33-40 | 865             | 7.67               | 0.0670          | 6.818           | 1406.916           | 0           | 1405.569           | 0       | 1404.30       |
| ANAC050      | 670             | 2.33               | 0.0840          | 8.166           | 1361.231           | 0           | 1359.888           | 0       | 1358.62       |
| HY5          | 923             | 12.17              | 0.0481          | 6.245           | 1343.454           | 0           | 1342.115           | 0       | 1340.84       |
| MED12        | 763             | 5.00               | 0.1199          | 7.254           | 1340.879           | 0           | 1339.542           | 0       | 1338.26       |
| TT1          | 840             | 8.50               | 0.0523          | 6.627           | 1318.419           | 0           | 1317.086           | 0       | 1315.81       |
| NFYB2        | 956             | 17.50              | 0.0379          | 5.772           | 1257.007           | 0           | 1255.678           | 0       | 1254.39       |
| ANAC13       | 546             | 1.17               | 0.2985          | 8.870           | 1225.774           | 0           | 1224.448           | 0       | 1223.16       |
| WRKY18       | 752             | 6.67               | 0.0642          | 6.818           | 1223.529           | 0           | 1222.206           | 0       | 1220.91       |
| NAC053       | 556             | 1.33               | 0.1037          | 8.704           | 1220.299           | 0           | 1218.979           | 0       | 1217.68       |
| ARR10        | 719             | 7.33               | 0.0722          | 6.615           | 1126.579           | 0           | 1125.263           | 0       | 1123.96       |
| TPR1         | 797             | 12.33              | 0.0339          | 6.014           | 1105.749           | 0           | 1104.436           | 0       | 1103.13       |
| BRM          | 705             | 7.17               | 0.0819          | 6.620           | 1105.722           | 0           | 1104.412           | 0       | 1103.11       |
| WRKY40       | 633             | 4.33               | 0.0751          | 7.191           | 1101.116           | 0           | 1099.81            | 0       | 1098.50       |
| RD26         | 701             | 8.50               | 0.0588          | 6.366           | 1046.310           | 0           | 1045.008           | 0       | 1043.70       |
| ANAC057      | 520             | 2.00               | 0.0950          | 8.022           | 1034.993           | 0           | 1033.693           | 0       | 1032.38       |
| RPS4         | 386             | 0.33               | 0.2885          | 10.177          | 1019.856           | 0           | 1018.559           | 0       | 1017.24       |
| NAC017       | 385             | 0.33               | 0.5086          | 10.174          | 1016.791           | 0           | 1015.497           | 0       | 1014.18       |
| AGO4         | 804             | 16.67              | 0.0343          | 5.592           | 1015.052           | 0           | 1013.761           | 0       | 1012.44       |
| ATHB-6       | 699             | 9.33               | 0.0567          | 6.227           | 1014.406           | 0           | 1013.119           | 0       | 1011.79       |
| ANAC102      | 585             | 4.83               | 0.0814          | 6.919           | 970.401            | 0           | 969.1175           | 0       | 967.79        |
| GBF3         | 689             | 10.33              | 0.0406          | 6.059           | 965.617            | 0           | 964.3356           | 0       | 963.00        |
| ATHB-7       | 685             | 10.50              | 0.0475          | 6.028           | 953.627            | 0           | 952.3493           | 0       | 951.01        |
| CAMTA2       | 640             | 7.83               | 0.0504          | 6.352           | 952.993            | 0           | 951.7178           | 0       | 950.38        |
| AT5G50360    | 642             | 8.50               | 0.0466          | 6.239           | 934.301            | 0           | 933.0291           | 0       | 931.69        |
| EICBP-B      | 494             | 2.50               | 0.0691          | 7.626           | 924.704            | 0           | 923.4347           | 0       | 922.09        |
| SMXL6        | 562             | 5.83               | 0.0650          | 6.590           | 877.121            | 0           | 875.8547           | 0       | 874.51        |
| LHY          | 575             | 6.67               | 0.0453          | 6.430           | 869.948            | 0           | 868.685            | 0       | 867.33        |
| RBOHJ        | 573             | 6.83               | 0.0527          | 6.390           | 859.992            | 0           | 858.7324           | 0       | 857.38        |
| AT5G04760    | 595             | 8.17               | 0.0540          | 6.187           | 856.956            | 0           | 855.699            | 0       | 854.34        |
| ZAT6         | 622             | 10.00              | 0.0462          | 5.959           | 853.533            | 0           | 852.2787           | 0       | 850.92        |
| ABC1K1       | 455             | 2.33               | 0.1022          | 7.607           | 849.392            | 0           | 848.1407           | 0       | 846.78        |
| AGL8         | 592             | 8.33               | 0.0470          | 6.151           | 846.238            | 0           | 844.9894           | 0       | 843.62        |
| MYB44        | 581             | 7.83               | 0.0475          | 6.213           | 841.327            | 0           | 840.0809           | 0       | 838.71        |
| ABF3         | 601             | 9.17               | 0.0574          | 6.035           | 838.384            | 0           | 837.141            | 0       | 835.77        |
| GBF2         | 568             | 7.67               | 0.0493          | 6.211           | 822.305            | 0           | 821.0645           | 0       | 819.69        |
| ANAC016      | 353             | 0.67               | 0.2793          | 9.048           | 812.906            | 0           | 811.6683           | 0       | 810.29        |
| SPCH         | 605             | 10.50              | 0.0418          | 5.848           | 810.498            | 0           | 809.2636           | 0       | 807.88        |
| ELF3         | 457             | 3.00               | 0.0683          | 7.251           | 804.278            | 0           | 803.0458           | 0       | 801.66        |
| MYC3         | 607             | 11.17              | 0.0420          | 5.764           | 798.057            | 0           | 796.8284           | 0       | 795.44        |
| TZP          | 496             | 4.67               | 0.0597          | 6.732           | 795.518            | 0           | 794.2947           | 0       | 792.90        |



**Table S3. Arabidopsis mutant lines used**

| Name of mutant line | Designation in stock centre | Gene name                                                            | Arabidopsis gene identifier | Mutant background | PubMed ID      |
|---------------------|-----------------------------|----------------------------------------------------------------------|-----------------------------|-------------------|----------------|
| toct1-101           | toct1-101 t-DNA             | TOCT1 (TIMING OF CAB EXPRESSION1)                                    | AT5G61380                   | Col-0             | PMID: 16212608 |
| cca1-1 lhy-11       | cca1-1 lhy-11 t-DNA         | CCA1 (CIRCADIAN CLOCK-ASSOCIATED 1) / LHY (LATE ELONGATED HYPOCOTYL) | AT2G48830/AT1G01060         | Col-0             | PMID: 17540692 |
| elf3-7              | elf3-7 EMS                  | ELF3 (EARLY FLOWERING3)                                              | AT2G25930                   | Col-0             | PMID: 11402160 |
| elf4-101            | elf4-101 t-DNA              | ELF4 (EARLY FLOWERING4)                                              | AT2G40080                   | Col-0             | PMID: 14605220 |
| prr7-3              | SALK_030430C                | PRR7 (PSEUDO-RESPONSE REGULATOR 7)                                   | AT5G02810                   | Col-0             | PMID: 15705949 |
| bzip60              | SALK_050203C                | BASIC REGION/LEUCINE ZIPPER MOTIF 60                                 | AT1G42990                   | Col-0             | PMID: 18574595 |
| aox1a-1             | SALK_084897                 | AOX1a (ALTERNATIVE OXIDASE 1a)                                       | AT3G22370                   | Col-0             | PMID: 18424626 |
| rao2-1              | rao2-1 EMS                  | ANAC017 (Arabidopsis NAC domain-containing protein 17)               | AT1G34190                   | Col.LLUC          | PMID: 24045017 |
| ANAC017-OE2         | rao2 complementation        | ANAC017 (Arabidopsis NAC domain-containing protein 17)               | AT1G34191                   | Col.LLUC          | PMID: 30872424 |

**Table S4. Binding sites of transcription factors regulating clock- and light-dependent processes to 56 genes that showed enhanced binding of ANAC017 in light upon**

| seqnames | start    | end      | log2(Fold) | p.value  | FDR      | gene      | location      | Bound by clock component, NACs (IGV)                                         |
|----------|----------|----------|------------|----------|----------|-----------|---------------|------------------------------------------------------------------------------|
| chr1     | 1704628  | 1705028  | 1.96       | 4.54E-10 | 1.59E-07 | AT1G05680 | promoter      | GI, PIF3, LHY, HYS, CCA1, NAC16, PIF4, ELF3, NAC102                          |
| chr2     | 15424916 | 15425316 | 1.56       | 5.48E-07 | 5.70E-05 | AT2G36800 | promoter      | NAC102, LHY, NAC16, PIF3, CCA1, ELF3, GI                                     |
| chr5     | 17176040 | 17176440 | 1.49       | 4.34E-06 | 1.90E-04 | AT5G42830 | promoter      | PIF3, NAC102, HYS, ELF3                                                      |
| chr4     | 10349922 | 10350322 | 1.39       | 2.78E-06 | 1.62E-04 | AT4G18880 | promoter      | HYS, LHY, GI, NAC102, PIF4, CCA1, PIF5, HYS                                  |
| chr4     | 8974434  | 8974834  | 1.34       | 5.92E-06 | 2.12E-04 | AT4G15760 | promoter      | LHY, PIF5, NAC102, GI, HYS, NAC13                                            |
| chr5     | 25678321 | 25678721 | 1.34       | 3.03E-05 | 4.61E-04 | AT5G64190 | promoter      | LHY, GI, PRR5, NAC102, NAC16,                                                |
| chr2     | 1339433  | 1339833  | 1.33       | 6.51E-07 | 5.70E-05 | at2g04050 | promoter      | GI, ELF3, NAC102, PIF3, NAC13, NAC16, NAC17                                  |
| chr4     | 17571669 | 17572069 | 1.32       | 6.92E-06 | 2.12E-04 | at4g37370 | promoter      | ELF3, NAC102, PIF3, ELF3, PIF4, NAC16, HYS                                   |
| chr3     | 20633874 | 20634274 | 1.32       | 7.74E-06 | 2.12E-04 | at3g55620 | promoter      | ELF3, NAC102, CCA1                                                           |
| chr5     | 17458834 | 17459234 | 1.32       | 3.35E-06 | 1.67E-04 | at5g43450 | promoter      | NAC102, PIF3, PIF5, PIF4, HYS, GI, CCA1, NAC16, NAC13, NAC17                 |
| chr2     | 7919227  | 7919627  | 1.28       | 7.89E-06 | 2.12E-04 | at2g18193 | promoter      | GI, PIF5, PIF3, HYS, NAC17                                                   |
| chr2     | 9254179  | 9254579  | 1.28       | 3.88E-05 | 4.98E-04 | at2g21640 | promoter      | NAC13, NAC16, PIF4, PIF3, HYS, NAC17                                         |
| chr1     | 11668583 | 11668983 | 1.27       | 2.68E-05 | 4.51E-04 | at1g32350 | promoter      | NAC102, ELF3, PIF3                                                           |
| chr5     | 4755903  | 4756303  | 1.25       | 3.85E-05 | 4.98E-04 | at5g14730 | promoter      | LHY, CCA1, PIF5, NAC102, HYS, NAC16, ELF3                                    |
| chr2     | 2141171  | 2141571  | 1.24       | 1.34E-05 | 3.12E-04 | at2g05710 | promoter      | NAC102, GI, LHY, PIF4, HYS, ELF3, PRR7                                       |
| chr4     | 9600036  | 9600436  | 1.22       | 1.60E-05 | 3.29E-04 | at4g17080 | promoter      | HYS, PIF4, NAC16, PIF4, NAC102, PRR7, HYS, PIF5                              |
| chr1     | 27233328 | 27233728 | 1.22       | 5.72E-05 | 5.72E-04 | at1g72330 | promoter      | HYS, PIF4, GI, PIF3, LHY, NAC102                                             |
| chr4     | 9673347  | 9673747  | 1.21       | 1.49E-04 | 1.11E-03 | at4g17260 | promoter      | PIF3, LHY, NAC16, NAC13                                                      |
| chr2     | 19316310 | 19316710 | 1.21       | 4.22E-05 | 5.09E-04 | at2g47000 | promoter      | PIF3, GI, HYS, LHY, NAC13, PIF3, NAC16                                       |
| chr3     | 16923206 | 16923606 | 1.2        | 2.16E-04 | 1.45E-03 | at3g46080 | promoter      | PIF4, HYS, NAC102, PIF3                                                      |
| chr3     | 9194971  | 9195371  | 1.2        | 2.96E-05 | 4.61E-04 | at3g25250 | promoter      | GI, PIF4, PIF3, PIF5, HYS, NAC102, LHY, NAC13                                |
| chr5     | 4891405  | 4891805  | 1.2        | 2.70E-05 | 4.51E-04 | at5g15090 | promoter      | PIF3, NAC13, ELF3, HYS, NAC102, GI                                           |
| chr1     | 28745687 | 28746087 | 1.18       | 1.08E-04 | 8.40E-04 | at1g76600 | promoter      | NAC102, PIF4, HYS, PIF5, PIF3, PRR5, ELF3                                    |
| chr5     | 16290458 | 16290858 | 1.18       | 1.33E-05 | 3.12E-04 | at5g40690 | promoter      | NAC102, PIF3, PIF4, HYS, PIF5, GI, NAC16, NAC17                              |
| chr2     | 8930466  | 8930866  | 1.18       | 2.00E-05 | 3.68E-04 | at2g20720 | promoter      | HYS, PIF3, NAC012, NAC16, NAC17, ELF3, GI                                    |
| chr1     | 11927803 | 11928203 | 1.18       | 5.19E-05 | 5.68E-04 | at1g32920 | promoter      | PIF5, PRR5, ELF3, PIF3, PRR7, LHY, NAC16, NAC13                              |
| chr3     | 1080736  | 1081136  | 1.18       | 9.68E-05 | 8.06E-04 | at3g04120 | promoter      | PIF4, LHY, NAC102, PIF5, GI, CCA1, HYS, PRR5, PRR7,                          |
| chr2     | 1150375  | 1150775  | 1.17       | 9.19E-05 | 7.84E-04 | at2g03760 | promoter      | NAC102, PIF5, NAC13, NAC17,                                                  |
| chr3     | 2753011  | 2753411  | 1.16       | 9.91E-05 | 8.07E-04 | at3g09020 | promoter      | NAC102, GI, PIF5, ELF3, PIF4, PIF3, HYS                                      |
| chr5     | 2860724  | 2861124  | 1.15       | 5.57E-05 | 5.72E-04 | at5g08790 | promoter      | ELF3, PIF3, PRR5, LHY, NAC102,                                               |
| chr1     | 21887253 | 21887653 | 1.15       | 4.84E-05 | 5.47E-04 | at1g59590 | promoter      | NAC16, PIF4, HYS, PIF5, NAC102, PIF3, NAC13, LHY                             |
| chr5     | 15631171 | 15631571 | 1.14       | 3.30E-04 | 1.99E-03 | at5g39050 | promoter      | NAC102, HYS, GI, PIF4, ELF3,                                                 |
| chr5     | 24101769 | 24102169 | 1.13       | 2.95E-04 | 1.81E-03 | at5g59820 | promoter      | PIF3, CCA1, LHY, GI, PIF5, NAC16, PRR7,                                      |
| chr2     | 6758359  | 6758759  | 1.11       | 2.00E-03 | 8.24E-03 | at2g15480 | promoter      | LHY, ELF3, GI, PIF4, NAC102, PIF3, HYS,                                      |
| chr2     | 13631756 | 13632156 | 1.11       | 3.98E-05 | 4.98E-04 | at2g32020 | promoter      | LHY, HYS, ELF3, GI, PIF4, PIF5, NAC102PRR7, PIF3, NAC16, NAC13               |
| chr4     | 2234575  | 2234975  | 1.1        | 4.35E-04 | 2.49E-03 | at4g04490 | promoter      | PIF3, ELF3, NAC16, NAC102, NAC13, HYS                                        |
| chr1     | 16137385 | 16137785 | 1.1        | 8.02E-05 | 7.39E-04 | at1g42990 | promoter      | NAC102, NAC13, LHY, NAC16, HYS, PIF5, PRR5, PIF3,                            |
| chr1     | 5869467  | 5869867  | 1.1        | 1.54E-03 | 6.73E-03 | at1g17170 | promoter      | NAC102, HYS, NAC13, ELF3                                                     |
| chr2     | 1982979  | 1983379  | 1.09       | 3.25E-03 | 1.19E-02 | at2g05420 | promoter      | NAC17, NAC13, ELF3, PIF3, NAC16,                                             |
| chr5     | 6597839  | 6598239  | 1.09       | 1.41E-03 | 6.25E-03 | at5g19550 | promoter      | HYS, ELF3, LHY, PIF3                                                         |
| chr1     | 8384808  | 8385208  | 1.09       | 1.56E-04 | 1.12E-03 | at1g23710 | promoter      | LHY, NAC102, PIF5, GI, HYS, PIF4, PRR5, CCA1, PRR7, ELF3, PIF3, NAC13, NAC16 |
| chr2     | 19010963 | 19011363 | 1.09       | 1.52E-04 | 1.11E-03 | at2g46310 | promoter      | NAC16, PIF3, PIF5, PIF4, PRR5, PRR7, HYS,                                    |
| chr2     | 6761302  | 6761702  | 1.08       | 2.82E-03 | 1.12E-02 | at2g15480 | coding        | PIF3, HYS, ELF3, PIF4, PIF5,                                                 |
| chr1     | 3337908  | 3338308  | 1.08       | 2.24E-04 | 1.48E-03 | at1g10170 | promoter      | PIF3, NAC102, ELF3, GI, PIF4, HYS, NAC16                                     |
| chr3     | 4201689  | 4202089  | 1.06       | 5.89E-04 | 3.06E-03 | at3g13080 | promoter      | ELF3, HYS, PIF3, PIF4, GI, LHY, NAC16, PRR5                                  |
| chr2     | 17409171 | 17409571 | 1.06       | 1.01E-04 | 8.07E-04 | at2g41730 | promoter      | NAC16, NAC102, GI, PIF3, LHY, PIF4, NAC13, ELF3, HYS                         |
| chr3     | 3270929  | 3271329  | 1.06       | 4.32E-04 | 2.49E-03 | at3g10500 | promoter      | LHY, PIF5, ELF3, NAC102, PIF4, HYS, CCA1, PIF3, GI,                          |
| chr3     | 7906346  | 7906746  | 1.05       | 8.94E-05 | 7.82E-04 | at3g22370 | promoter      | LHY, CCA1, GI, NAC102, GI, PIF4, PIF5, NAC13, HYS, NAC16ELF3, PRR7, PRR5,    |
| chr2     | 18232564 | 18232964 | 1.05       | 3.49E-04 | 2.07E-03 | at2g44070 | promoter      | PIF3, CCA1, ELF3, PIF4, HYS, PRR5, PIF5                                      |
| chr4     | 5447679  | 5448079  | 1.05       | 1.07E-03 | 4.94E-03 | at4g08555 | promoter      | PIF3, HYS, NAC16, CCA1, NAC102                                               |
| chr2     | 8955716  | 8956116  | 1.04       | 9.47E-04 | 4.42E-03 | at2g20800 | promoter      | NAC17                                                                        |
| chr4     | 13904123 | 13904523 | 1.03       | 5.01E-04 | 2.78E-03 | at4g27940 | promoter      | LHY, NAC102, PIF4, HYS, PIF5, ELF3, PRR5, PIF3, NAC13, NAC16, GI, TOC1       |
| chr1     | 5871422  | 5871822  | 1.02       | 1.29E-02 | 3.28E-02 | at1g17180 | promoter      | LHY, NAC13, NAC16                                                            |
| chr4     | 9390778  | 9391178  | 1.01       | 2.39E-04 | 1.55E-03 | at4g16680 | promoter      | NAC16, PRR5, NAC102, ELF3, GI, NAC13, CCA1, PIF3, PRR7                       |
| chr3     | 11195249 | 11195649 | 1.01       | 5.94E-04 | 3.06E-03 | at3g29250 | promoter      | PIF4, PIF5, GI, NAC102, LHY, HYS, PIF3, NAC16, PRR5, NAC17,                  |
| chr4     | 7494167  | 7494567  | 1          | 2.81E-04 | 1.76E-03 | at4g12735 | promoter      | ELF3, NAC102, HYS, PIF4, PIF3, NAC13, NAC16,                                 |
| chr1     | 11615929 | 11616329 | 1          | 8.08E-04 | 3.93E-03 | at1g32230 | 3' UTR region | HYS, PIF5, PIF4, PIF3, GI, ELF3                                              |

**Table S5. Primers sequences used in this study.**

| Name                         | Arabidopsis gene identifier | Sequence (5'- 3')                                                  | Use                                      |
|------------------------------|-----------------------------|--------------------------------------------------------------------|------------------------------------------|
| attB1F_NAC17_linker_noATG_FW | At1g34190                   | GGGGACAAGTTTGTACAAAAAAGCAGGCTCCGGATCCGGAGGTGAGCGGATTCTTACCCGATT    | gateway cloning of CDS of NAC17          |
| attB2R_NAC17_linker_rev      | At1g34190                   | GGGGACCACTTTGTACAAGAAAGCTGGGTCCACCTCCGGATCGMGTCTTCAAGAGAAAGACTCTAC | gateway cloning of CDS of NAC17          |
| attB4_2kb PromNAC17_FW       | At1g34190                   | GGGGACAAGTTTGTACAAAAAAGCAGGCTCCAGTGTGATGATACTAAATTTTGG             | gateway cloning of 2kb promoter of NAC17 |
| attB1r_PromNAC17_Rev         | At1g34190                   | GGGGACTGCTTTTTGTACAACCTGCTACGTAACAAATCAAACCCGATC                   | gateway cloning of 2kb promoter of NAC17 |
| attB1F_GFP_FW                | At1g34190                   | GGGGACAAGTTTGTACAAAAAAGCAGGCTCCAGTGTGATGATACTAAATTTTGG             | gateway cloning of GFP                   |
| attB2R_GFP linker_REV        | At1g34190                   | GGGGACCACTTTGTACAAGAAAGCTGGGTCCACCTCCGGATCCCTGTACAGCTCGTCCATGCC    | gateway cloning of GFP                   |
| UBC_qRT_F                    | At5g25760                   | CTGCAGCTCAGGGAATCTTCTA                                             | qPCR                                     |
| UBC_qRT_R                    | At5g25760                   | TTGTGCCATTGAATTGAACCC                                              | qPCR                                     |
| CCA1_QRT_F                   | AT2G46830                   | TCGAAAGACGGGAAGTGAACG                                              | qPCR                                     |
| CCA1_QRT_R                   | AT2G46830                   | GTCGATCTTCATTGGCCATCTCAG                                           | qPCR                                     |
| LHY_QRT_F                    | AT1G01060                   | GAGCTTGGCAACGAATTGAAGAAC                                           | qPCR                                     |
| LHY_QRT_R                    | AT1G01060                   | AAAGCTTGGCAAACAGGGATGC                                             | qPCR                                     |
| PRR5_QRT_F                   | AT5G24470                   | CAGCTTTCACACGGTACGTTTAC                                            | qPCR                                     |
| PRR5_QRT_R                   | AT5G24470                   | TTGGAGGCGGTTACAGATGATTG                                            | qPCR                                     |
| PIF4_QRT_F                   | AT2G43010                   | TCAGATGCAGCCGATGGAGATG                                             | qPCR                                     |
| PIF4_QRT_R                   | AT2G43010                   | CGACGGTGTGACTTGTGCTGCT                                             | qPCR                                     |
| NAC017_QRT_F                 | At1g34190                   | GTACTACCATAGCAAAGAAAGGG                                            | qPCR                                     |
| NAC017_QRT_R                 | At1g34190                   | AAGACTTCTACCTGAGACTCG                                              | qPCR                                     |
| AOX1a_qRT_F1                 | At3g22370                   | GACGGTCCGTACGGTTTTCG                                               | qPCR                                     |
| AOX1a_qRT_R1                 | At3g22370                   | CTTCTGATTGCGCTCCTCCTCT                                             | qPCR                                     |
| UGT74E2_RTF                  | At1g05680                   | TTTCCCTCTGTTCCCGATGCTG                                             | qPCR                                     |
| UGT74E2_RTR                  | At1g05680                   | TTCCGGTATGAGGACGATTCCG                                             | qPCR                                     |
| SOT12-qRT-F                  | AT2G03760                   | AAGGACTTTGGCACACAAAGC                                              | qPCR                                     |
| SOT12-qRT-R                  | AT2G03760                   | AAGAACTGGAAACTTGTGTCCG                                             | qPCR                                     |
| ATAF2-qRT-F                  | AT5G08790                   | TTGGGTATCAAGAAAGCACTCTG                                            | qPCR                                     |
| ATAF2-qRT-R                  | AT5G08790                   | ACCCAATCATCAAGCTGATGGTTG                                           | qPCR                                     |
| bzip60-qRT-F                 | AT1G42990                   | CGATGATGCTGGGCTAAAG                                                | qPCR                                     |
| bzip60-qRT-R                 | AT1G42990                   | TCTCAAGCATTCTTTCCGAGAT                                             | qPCR                                     |
| qAOX1D for                   | At1g32350                   | CTTTCACAACCAAAATGGTACG                                             | qPCR                                     |
| qAOX1D rev                   | At1g32351                   | GCCTCTTCTTAAGTATCCAGTG                                             | qPCR                                     |
| qRT_ANAC053_Fwd              | AT3G10500                   | GGGTTATGCATGAGTATCGTTGG                                            | qPCR                                     |
| qRT_ANAC053_Rev              | AT3G10500                   | GCACAAACGCATCTTGGTGAAC                                             | qPCR                                     |
| NDA1_qRT_Fwd                 | AT1G07180                   | GTATCCAACCCGGCGATTTACG                                             | qPCR                                     |
| NDA1_qRT_Rev                 | AT1G07180                   | AGTTACAGTCTCAATGCACTCT                                             | qPCR                                     |
| NDB2_qRT_Fwd                 | AT4G05020                   | CATCCTGACCATTGTTGACAAGAG                                           | qPCR                                     |
| NDB2_qRT_Rev                 | AT4G05020                   | CTCTCTCTTTGTTTTTACGAG                                              | qPCR                                     |
| ACO3_qPCR_For                | AT2G05710                   | TGAGTATGGAAAGTGGATGCTCAG                                           | qPCR                                     |
| ACO3_qPCR_Rev                | AT2G05710                   | AATCACCGCTTTAACCCCTGTAG                                            | qPCR                                     |
| ACTIN2_CHIP_FWD              | AT3G18780                   | ACTACGAGCAGGAGATGGAACCT                                            | CHIP-qPCR                                |
| ACTIN2_CHIP_REV              | AT3G18780                   | GCAGCTTCCATCCCAACAAAGAG                                            | CHIP-qPCR                                |
| AOX1a_CHIP_FWD               | AT3G22370                   | AGCTCTTGGGACCAACGCAA                                               | CHIP-qPCR                                |
| AOX1a_CHIP_REV               | AT3G22370                   | CCCTTGTGGTCATGAGAGAGACT                                            | CHIP-qPCR                                |
| UGT74E2_CHIP-1F              | At1g05680                   | TTGTCTATGTTCCGTGGCGCA                                              | CHIP-qPCR                                |
| UGT74E2_CHIP-1R              | At1g05680                   | GCAGTGTCTCTCTCAGGG                                                 | CHIP-qPCR                                |
| DOG1_CHIP-1F                 | AT2G36800                   | AGGATAAGATGCGTGGAGAGAT                                             | CHIP-qPCR                                |
| DOG1_CHIP-1R                 | AT2G36800                   | GTGAGCCCTCAAGTTGTTG                                                | CHIP-qPCR                                |
| HSFA4A_CHIP-1F               | AT4G18880                   | AGATTGGGTTTGGTGAATGT                                               | CHIP-qPCR                                |
| HSFA4A_CHIP-1R               | AT4G18880                   | ACAACGAATTTCTTACGGCCA                                              | CHIP-qPCR                                |
| AOX1d_CHIP-1F                | AT1G32350                   | TGGAGGAAATGTTTGACACGT                                              | CHIP-qPCR                                |
| AOX1d_CHIP-1R                | AT1G32350                   | AGTTGGTGTGTCTATCTGTGA                                              | CHIP-qPCR                                |
| ACO3_CHIP-1F                 | AT2G05710                   | GAGAGGGGCTCGTAGATTA                                                | CHIP-qPCR                                |
| ACO3_CHIP-1R                 | AT2G05710                   | TTGGGATCGATCATGGAAGCA                                              | CHIP-qPCR                                |
| ABC84_CHIP-1F                | AT2G47000                   | AGCAAGAAACACGCTCGAATTT                                             | CHIP-qPCR                                |
| ABC84_CHIP-1R                | AT2G47000                   | TCATTGATTCTGAAAGGGCGCA                                             | CHIP-qPCR                                |
| VDAC3_CHIP-1F                | AT5G15090                   | CATGAGTCGGTGTCCCTCTT                                               | CHIP-qPCR                                |
| VDAC3_CHIP-1R                | AT5G15090                   | CTAGAGAGTACACGGCTTCG                                               | CHIP-qPCR                                |
| SOT12_CHIP-1F                | AT2G03760                   | GTTTGGGTGGTGAATGGTCA                                               | CHIP-qPCR                                |
| SOT12_CHIP-1R                | AT2G03760                   | AGAGTCGTGATTCTCTCTTTTC                                             | CHIP-qPCR                                |
| ANAC081_CHIP-1F              | AT5G08790                   | ACCGTAATCTCTGCTTCTCA                                               | CHIP-qPCR                                |
| ANAC081_CHIP-1R              | AT5G08790                   | TACAACCTCCGCCCAAGAA                                                | CHIP-qPCR                                |
| bZIP60_CHIP-1F               | AT1G42990                   | ATGCTTCCAAATCTCCCG                                                 | CHIP-qPCR                                |
| bZIP60_CHIP-1R               | AT1G42990                   | ACCGTCCATAATCAACAGC                                                | CHIP-qPCR                                |
| ANAC053_CHIP-1F              | AT3G10500                   | CGGCTAGGATTACGAATGTGG                                              | CHIP-qPCR                                |
| ANAC053_CHIP-1R              | AT3G10500                   | TTGGTTCGCGCAAAATGAAGA                                              | CHIP-qPCR                                |
| NDB4_CHIP-1F                 | AT2G20800                   | AGGGTACGTGAGAGAGAGGT                                               | CHIP-qPCR                                |
| NDB4_CHIP-1R                 | AT2G20800                   | GGGAACGCGAACATAATGT                                                | CHIP-qPCR                                |
| RCD1_CHIP-1F                 | AT1G32230                   | CGTGTATTGACCGCTCTCT                                                | CHIP-qPCR                                |
| RCD1_CHIP-1R                 | AT1G32230                   | TTCTTAAGTCGGCGGTTCT                                                | CHIP-qPCR                                |
| CCA1_pgbkpad_F               | AT2G46830                   | CCG GAATTC ATGGAGACAA ATTCG                                        | Y2H cloning                              |
| CCA1_pgbkpad_R               | AT2G46830                   | CGC GGATCC TCATGTG GAAGC                                           | Y2H cloning                              |
| PIF5_pgbkpgad_F              | AT3G59060                   | ccg GAATTC ATGGAACAAGTGTTTG                                        | Y2H cloning                              |
| PIF5_pgbkpgad_R              | AT3G59060                   | cgc GGATCC TCAGCCTATTTTACC                                         | Y2H cloning                              |
| PIF4_pgbkpgad_F              | AT2G43010                   | ggaattc CATATG ATGGAACCAAGGT                                       | Y2H cloning                              |
| PIF4_pgbkpgad_R              | AT2G43010                   | ccg GAATTC CTAGTGTCCAAACG                                          | Y2H cloning                              |
| HY5_pgbkpgad_F               | AT5G11260                   | ccg GAATTC ATGCAGGAACAAGCG                                         | Y2H cloning                              |
| HY5_pgbkpgad_R               | AT5G11260                   | cgc GGATCC TCAAAGCTTGCATC                                          | Y2H cloning                              |
| ELF3_pgbkpgad_F              | AT2G25930                   | tcc CCCGGG ATGAAGAGAGGGAAA                                         | Y2H cloning                              |
| ELF3_pgbkpgad_R              | AT2G25930                   | cgcGGATCC TTAAGCTTAGAGGA                                           | Y2H cloning                              |
| PRR7_pgbkpgad_F              | AT5G02810                   | ccg GAATTC ATGAATGCTAATGAG                                         | Y2H cloning                              |
| PRR7_pgbk_R                  | AT5G02810                   | aaaa CTGCAG TTAGCTATCTCAATG                                        | Y2H cloning                              |
| PRR7_pgad_R                  | AT5G02810                   | cc ATCGAT TTAGCTATCTCAATG                                          | Y2H cloning                              |
| GI_pgbkpgad_F                | AT1G22770                   | ccg GAATTC ATGGCTAGTTCACT                                          | Y2H cloning                              |
| GI_pgbkpgad_R                | AT1G22770                   | cgc GGATCC TTATTGGGACAAGGA                                         | Y2H cloning                              |
| LYH_pgbkpgad_F               | AT1G01060                   | GGAATTCATATG ATGGATACTA ATACCTGG                                   | Y2H cloning                              |
| LYH_pgbkpgad_R               | AT1G01060                   | CGC GGATCC TCATGTAG AAGCTTC                                        | Y2H cloning                              |
| NAC017_pgbkpgad_F            | At1g34190                   | GGAATTC CATATG ATGGCGGATT CTCA                                     | Y2H cloning                              |
| NAC017_pgbkpgad_R            | At1g34190                   | TCC CCCGG CTA ACGGCTGAAGCTA                                        | Y2H cloning                              |
